# Supplementary material for: Copper selenide/amino hyperbranched polymer as an organic/inorganic hybrid composite cathode for rechargeable magnesium batteries
Source: Royal Society of Chemistry journal article supplement (doi:10.1039/d4ta00639a), 2024-01-01
Supplement: d4ta00639a1.pdf [file d4ta00639a1.pdf]

## Electronic Supplementary Information

# **Copper selenide/amino hyperbranched polymer as an organic/inorganic hybrid composite cathode for rechargeable magnesium batteries**

Lin Ran<sup>a</sup>, Hao Li<sup>a</sup>, Fei Xu<sup>c</sup>, Daohong Zhang<sup>a,b\*</sup>, Ting Li<sup>a,b\*</sup>

<sup>a</sup> Key Laboratory of Catalysis and Energy Materials Chemistry of Ministry of Education & Hubei Key Laboratory of Catalysis and Materials Science, Hubei R&D Center of Hyperbranched Polymers Synthesis and Applications, South-Central Minzu University, Wuhan 430074, China.

<sup>b</sup> Guangdong Provincial Laboratory of Chemistry and Fine Chemical Engineering Jieyang Center, Jieyang 515200, China

<sup>c</sup> Key Laboratory of Hydraulic Machinery Transients, Ministry of Education, School of Power and Mechanical Engineering, Wuhan University, Wuhan 430072, China.

\* E-mail:

Ting Li (liting@mail.scuec.edu.cn)

Daohong Zhang (daohong.zhang@scuec.edu.cn)

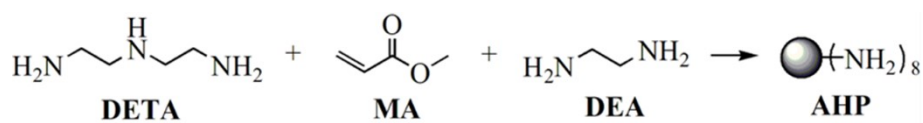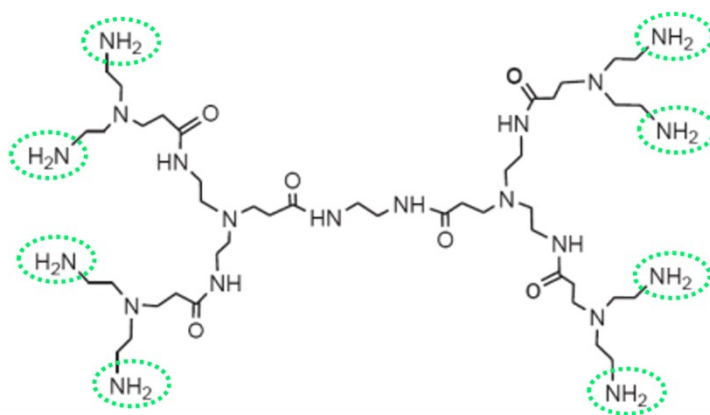

**Fig. S1.** Synthesis scheme and structure of AHP.

The synthesis process of amino hyperbranched polymer (AHP) is: a certain molar ratio of diethylenetriamine and methyl acrylate were added to methanol, and the mixture was stirred and reacted at 5 °C for 12 h. After dropwise addition of ethylenediamine, the mixture was reacted at 80 °C for 1 h and then at 130 °C for 8 h under nitrogen atmosphere to obtain liquid AHP.

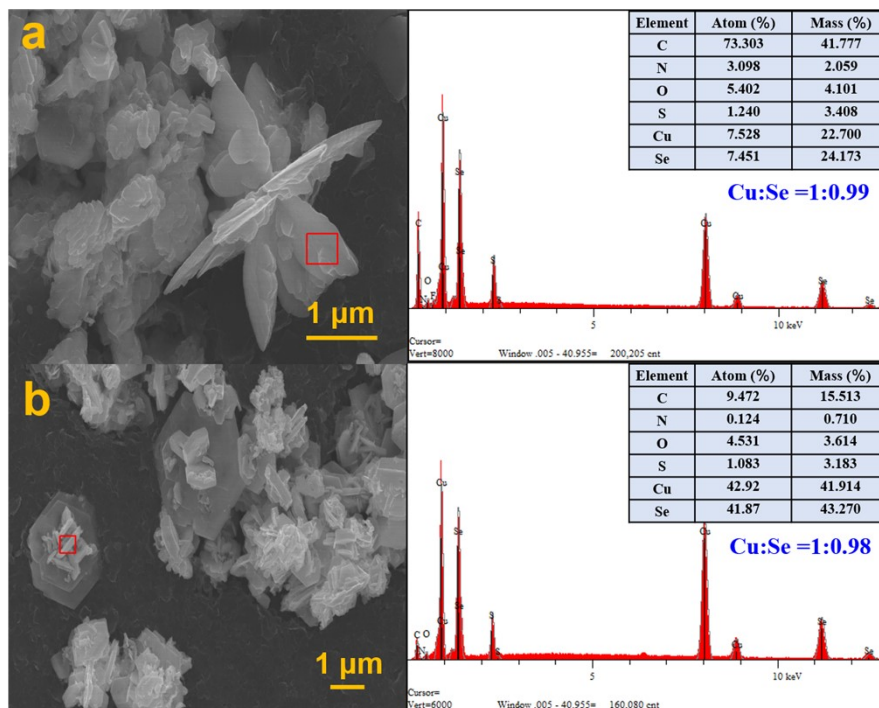

**Fig. S2.** EDS spectra of (a) CuSe-AHP and (b) CuSe samples.

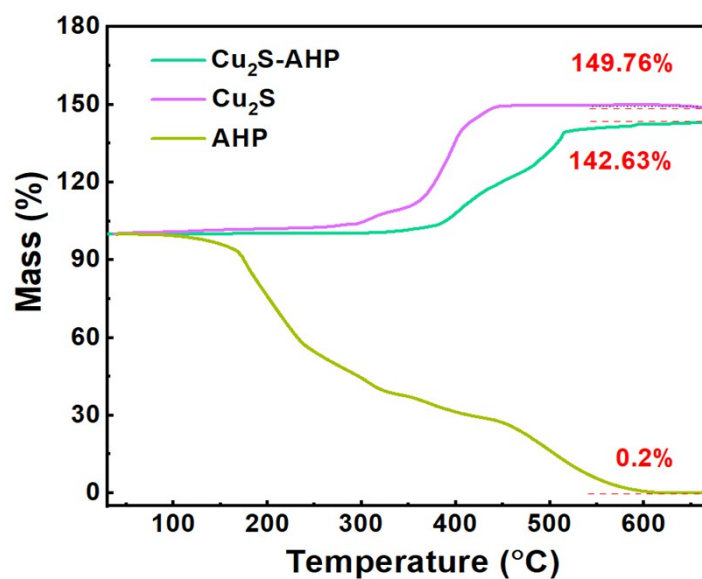

**Fig. S3.** TGA curves of AHP, Cu<sub>2</sub>S and Cu<sub>2</sub>S-AHP.

Pure Cu<sub>2</sub>S gets weight increase of 49.76% at 650 °C, which is consistent with the theoretical mass increase (oxidation to CuO and CuSO<sub>4</sub>), while AHP loses weight (99.8%) due to the decomposition. As a result, the mass change of Cu<sub>2</sub>S-AHP at 650 °C (42.63% increase) originates from the mass loss of AHP and mass increase of Cu<sub>2</sub>S, and thus the content of AHP in Cu<sub>2</sub>S-AHP is calculated to be 4.8 wt%.

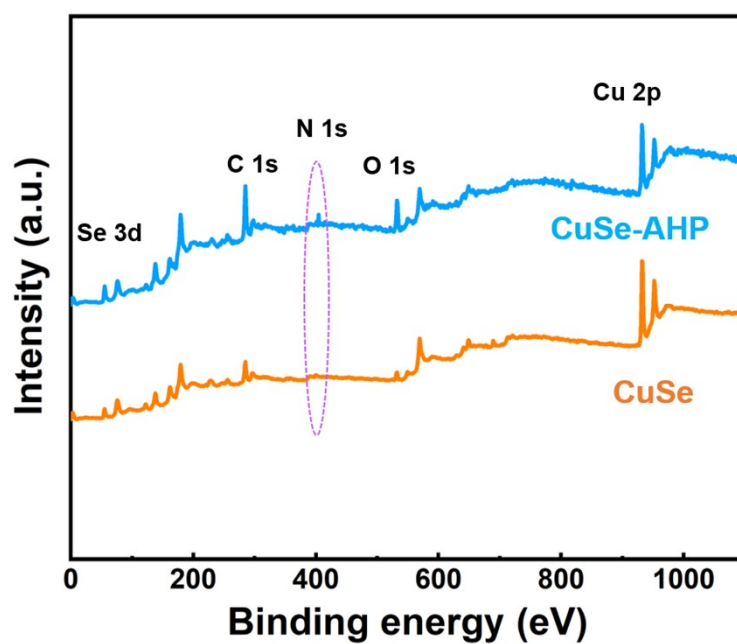

Fig. S4. Overall XPS spectra of CuSe-AHP and CuSe.

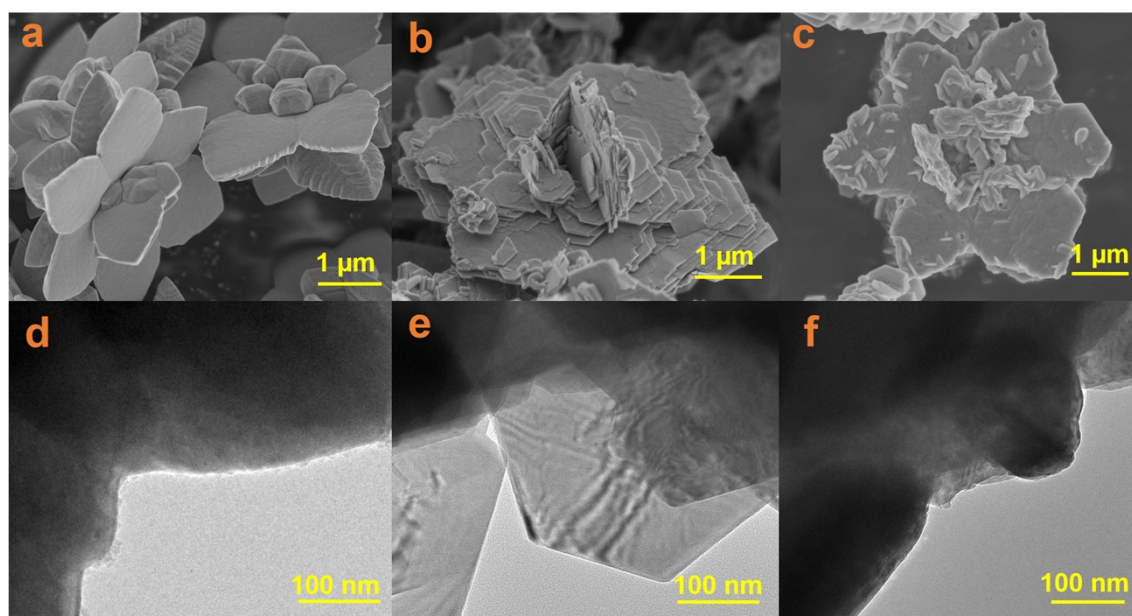

Fig. S5. SEM images of (a)  $\text{Cu}_2\text{S}$ -AHP, (b) CuSe-AHP and (c) CuSe. TEM images of (d)  $\text{Cu}_2\text{S}$ -AHP, (e) CuSe-AHP and (f) CuSe.

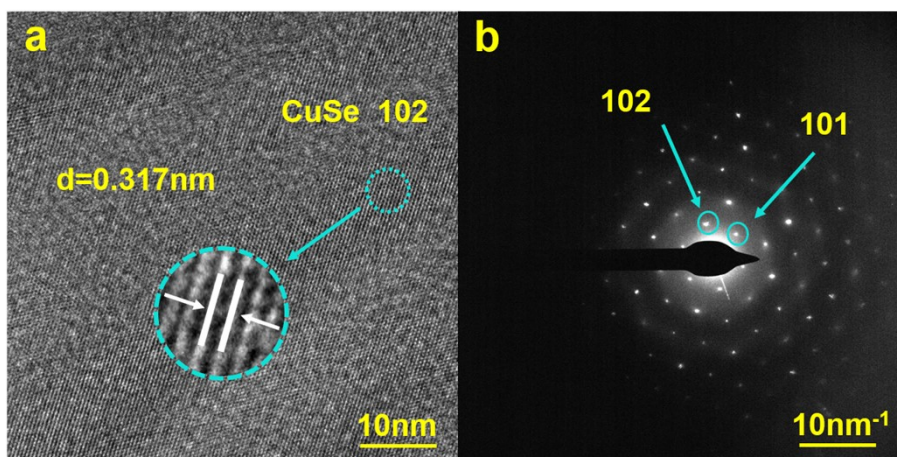

**Fig. S6.** (a) HRTEM image and (b) corresponding SAED pattern of CuSe.

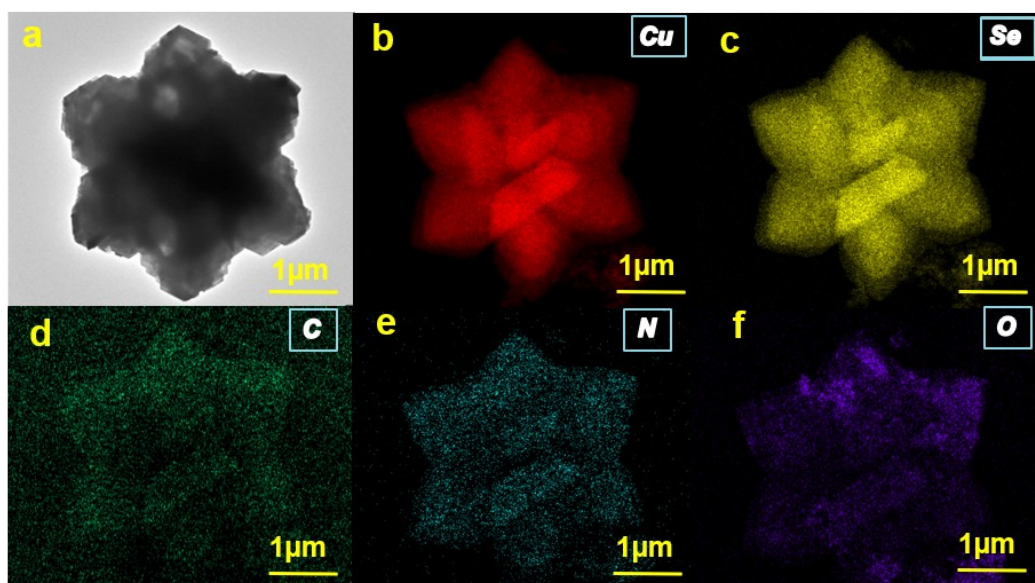

**Fig. S7.** (a) TEM image and (b-f) corresponding elemental (Cu, Se, C, N, O) mapping images of  $\text{Cu}_2\text{S}$ -AHP.



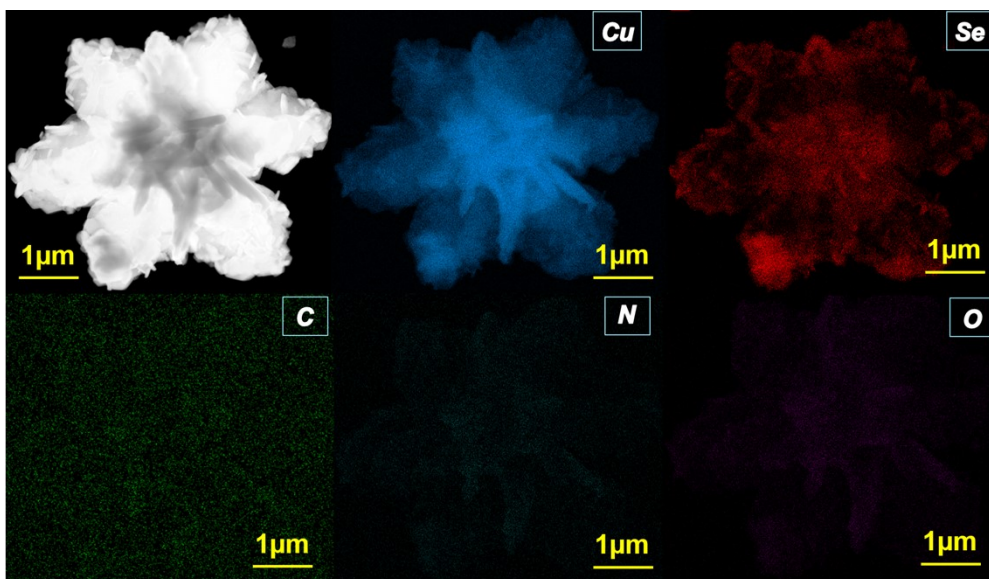

**Fig. S8.** HAADF STEM image and corresponding elemental (Cu, Se, C, N and O) mapping images of CuSe.

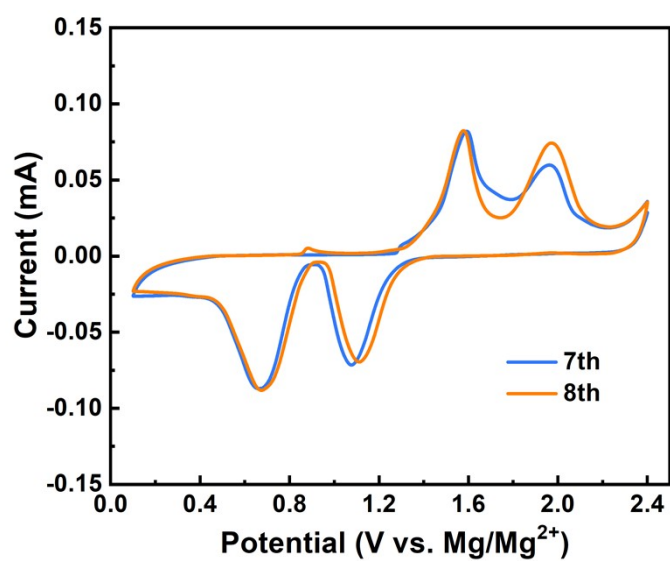

**Fig. S9.** CV curves of CuSe-AHP electrode at the 7th and 8th cycles ( $0.1 \text{ mV s}^{-1}$ )

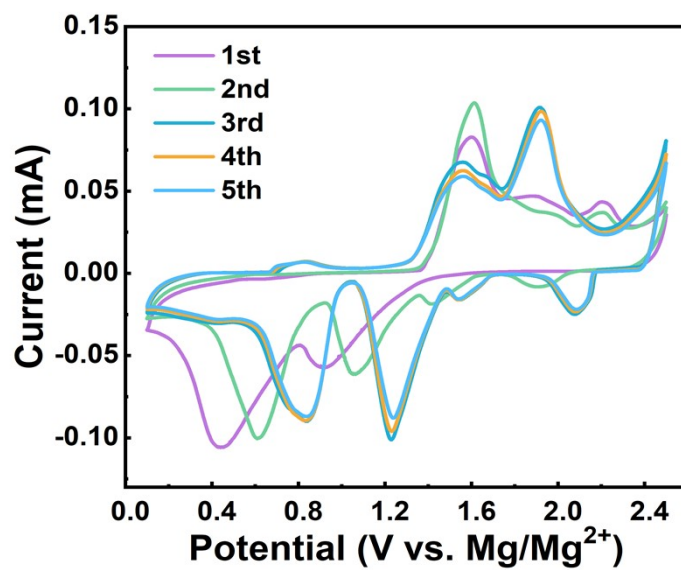

Fig. S10. CV curves of CuSe electrode at  $0.1 \text{ mV s}^{-1}$ .

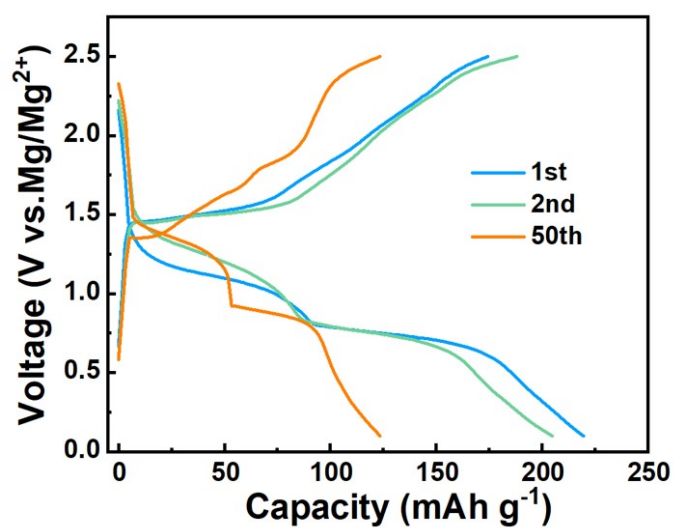

Fig. S11. Charge/discharge profiles of CuSe electrode at  $100 \text{ mA g}^{-1}$ .

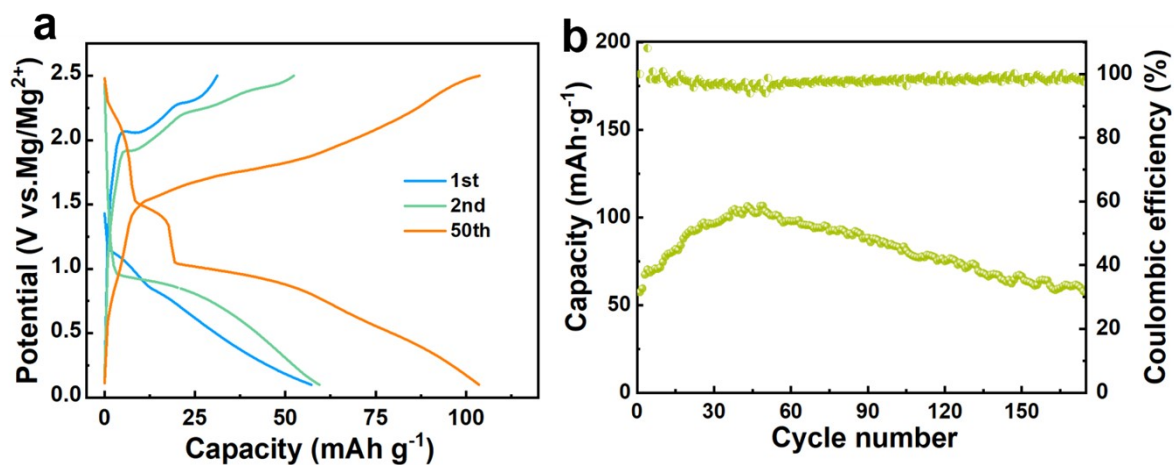

**Fig. S12.** (a) Charge/discharge profiles and (b) cycling performance of Cu<sub>2</sub>S-AHP electrode at 100 mA g<sup>-1</sup>.

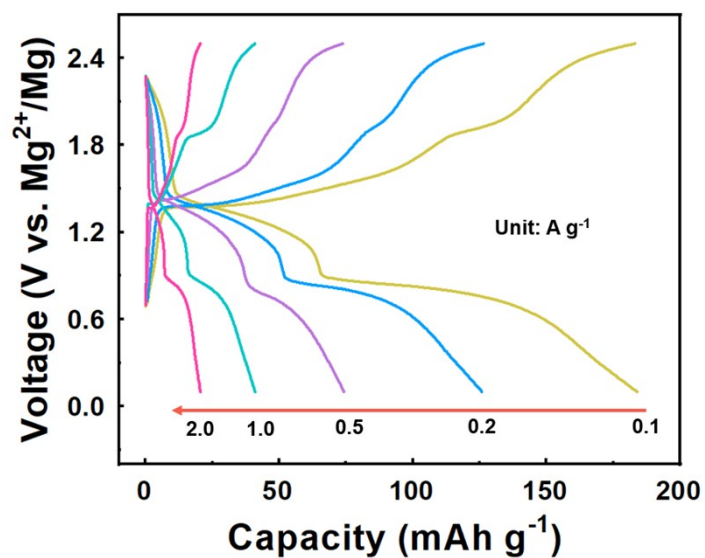

**Fig. S13.** Charge/discharge profiles of CuSe electrode at different current densities.



**Table S1** Comparison of the present results with previous reports.

| Materials                         | Electrolyte                                                          | Voltage range(V) | Current density (mA g <sup>-1</sup> ) | Capacity (mAh g <sup>-1</sup> ) | Ref       |
|-----------------------------------|----------------------------------------------------------------------|------------------|---------------------------------------|---------------------------------|-----------|
| CuSe-AHP                          | Mg(TFSI) <sub>2</sub> -MgCl <sub>2</sub> /DME                        | 0.1~2.5          | 100<br>1000                           | 227.6<br>87.5                   | This work |
| CuSe nanoparticles                | 0.25 M Mg(AlCl <sub>2</sub> EtBu) <sub>2</sub> /THF                  | 0.2~2.0          | 100                                   | 65                              | 1         |
| CoSe <sub>2</sub>                 | 0.5 M Mg-HMDS/G4                                                     | 0.1~2.5          | 100                                   | 150                             | 2         |
| Sb <sub>2</sub> Se <sub>3</sub>   | 0.5 M Mg-HMDS/G4                                                     | 0.1~2.2          | 1000                                  | 60                              | 3         |
| MoSe <sub>2</sub> /C              | 0.4 M (PhMgCl) <sub>2</sub> -0.2 M AlCl <sub>3</sub> -0.5 M LiCl/THF | 0.1~1.8          | 200                                   | 89                              | 4         |
| C-Cu <sub>2-x</sub> Se            | 0.2 M Mg-HMDS/DME                                                    | 0.3~2.2          | 100<br>1000                           | 138<br>48                       | 5<br>5    |
| NiCo <sub>2</sub> Se <sub>4</sub> | 0.3 M Mg-HMDSAICl <sub>3</sub> /G4                                   | 0.01~2.8         | 2000                                  | 40                              | 6         |
| Ag <sub>2</sub> Se@C              | 0.2 M APC/THF                                                        | 0.3~1.9          | 100                                   | 182                             | 7         |
| Ni <sub>0.85</sub> Se             | 0.4 M APC/THF+0.4 M LiCl                                             | 0.01~2.5         | 500                                   | 92                              | 8         |
| H-CoSe <sub>2</sub>               | 0.2 M Mg-HMDS/G4/MgCl <sub>2</sub>                                   | 0.01~2.6         | 50<br>500                             | 110<br>74                       | 9<br>9    |
| MoS <sub>2</sub>                  | APC                                                                  | 0.01~2.4         | 100<br>200                            | 60<br>50                        | 10<br>10  |
| MoS <sub>3</sub>                  | 0.2 M Mg-HMDS/DME                                                    | 0.3~2.6          | 100<br>1000                           | 175<br>75                       | 11        |
| Cu <sub>9</sub> S <sub>5</sub>    | 0.2 M Mg-HMDS/DME                                                    | 0.1~2.2          | 100<br>1000                           | 180<br>88                       | 12        |
| V <sub>2</sub> O <sub>5</sub>     | 0.25 M Mg(AlCl <sub>2</sub> EtBu) <sub>2</sub> /THF                  | 0.4~2.0          | 200                                   | 60                              | 13        |

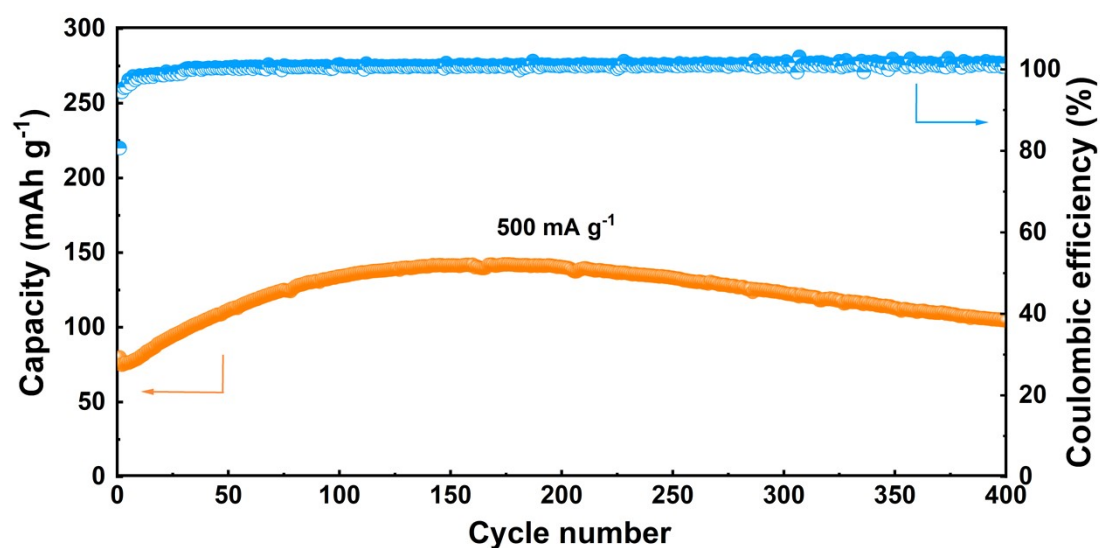

**Fig.S14.** Cycling performance of CuSe-AHP electrode at 500 mA g<sup>-1</sup>.

**Table S2** EIS simulation results of CuSe-AHP and CuSe electrodes after the first and 50th cycles in RMBs using the equivalent circuit as below.

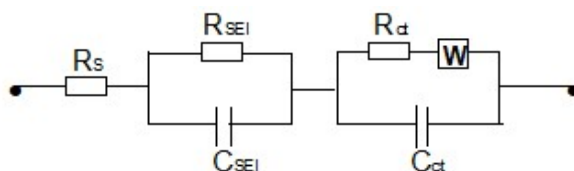

| Cycle            | CuSe-AHP           |                        |                       | CuSe               |                        |                       |
|------------------|--------------------|------------------------|-----------------------|--------------------|------------------------|-----------------------|
|                  | $R_s$ ( $\Omega$ ) | $R_{SEI}$ ( $\Omega$ ) | $R_{ct}$ ( $\Omega$ ) | $R_s$ ( $\Omega$ ) | $R_{SEI}$ ( $\Omega$ ) | $R_{ct}$ ( $\Omega$ ) |
| 1 <sup>st</sup>  | 19.4               | 11.4                   | 196.8                 | 21.2               | 14.3                   | 256.5                 |
| 50 <sup>th</sup> | 22.9               | 14.9                   | 172.3                 | 33.2               | 26.5                   | 284.2                 |

$R_s$ ,  $R_{SEI}$  and  $R_{ct}$  are the resistances of solution, solid electrolyte interface (SEI) film and charge transfer, respectively. W represents Warburg impedance

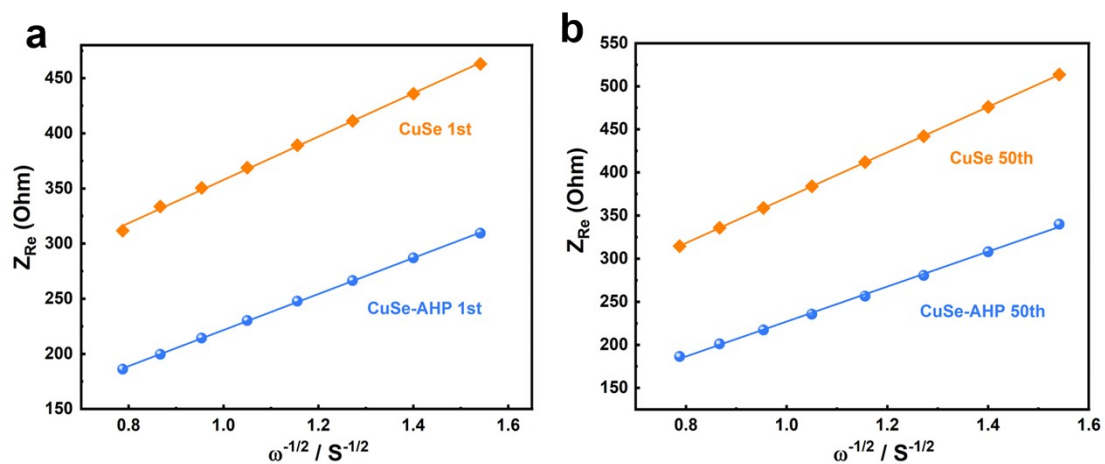

**Fig. S15.** Linear fitting of  $Z_{Re}$  with negative square root of angular frequency ( $\omega^{-1/2}$ ) in the low frequency diffusion region for CuSe-AHP and CuSe electrodes after (a) the 1st cycle and (b) 50th cycle.

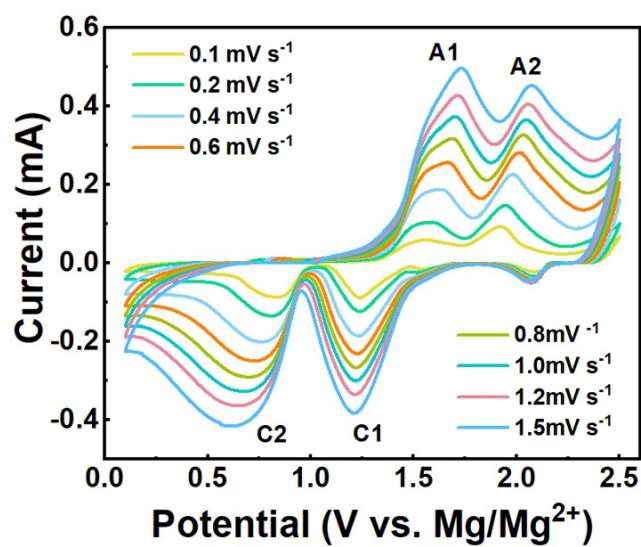

**Fig. S16.** CV profiles of CuSe electrode at different scan rates.

**Table S3.** The results of Mg<sup>2+</sup> diffusion coefficient of CuSe-AHP and CuSe electrodes calculated from CV.

| Peak | CuSe-AHP      |                                                   | CuSe          |                                                   |
|------|---------------|---------------------------------------------------|---------------|---------------------------------------------------|
|      | $i_p/v^{1/2}$ | $D (\times 10^{-11} \text{ cm}^2 \text{ s}^{-1})$ | $i_p/v^{1/2}$ | $D (\times 10^{-11} \text{ cm}^2 \text{ s}^{-1})$ |
| C1   | 0.0403        | 2.6862                                            | 0.0304        | 2.0246                                            |
| C2   | 0.0490        | 3.2232                                            | 0.0306        | 2.0835                                            |
| A1   | 0.0526        | 3.5024                                            | 0.0343        | 2.3528                                            |
| A2   | 0.0477        | 3.1708                                            | 0.0352        | 2.4047                                            |

The Mg<sup>2+</sup> diffusion coefficient is calculated by the following equation:<sup>14</sup>

$$i_p = 2.69 \times 10^5 n^{3/2} A D^{1/2} v^{1/2} C_0 \quad (\text{S1})$$

where  $i_p$  is the peak current (A),  $n$  is the number of electrons per molecule during the reaction,  $A$  is the contact area between the electrode and electrolyte,  $D$  is the diffusion coefficient of Mg<sup>2+</sup> (cm<sup>2</sup> s<sup>-1</sup>),  $C_0$  is the concentration of Mg<sup>2+</sup> in the electrode material (mol m<sup>-3</sup>), and  $v$  is the scan rate (V s<sup>-1</sup>).

**Table S4.** The results of Mg<sup>2+</sup> diffusion coefficient of CuSe-AHP and CuSe electrodes calculated from GITT.

|                     | $D_{\text{Mg}^{2+}} (10^{-11} \text{ cm}^2 \text{ s}^{-1})$ |                 |
|---------------------|-------------------------------------------------------------|-----------------|
|                     | CuSe-AHP                                                    | CuSe            |
| Peak C <sub>1</sub> | 2.4997 (1.21V)                                              | 1.5883 (1.20V)  |
| Peak C <sub>2</sub> | 3.2107 (0.80V)                                              | 2.6254 (0.81V)) |
| Peak A <sub>1</sub> | 3.8875 (1.49V)                                              | 2.4225 (1.50V)  |
| Peak A <sub>2</sub> | 2.8709 (1.82V)                                              | 1.9529 (1.82V)  |

The Mg-ion diffusion coefficients ( $D_{\text{Mg}^{2+}}$ ) of CuSe-AHP and CuSe electrodes can be calculated based on the following equation.<sup>15</sup>

$$D_{\text{Mg}^{2+}} = \frac{4}{\pi\tau} \left( \frac{m_B V_m}{M_B A} \right)^2 \left( \frac{\Delta E_s}{\Delta E_\tau} \right)^2 \quad (\text{S2})$$

where  $V_m$ ,  $M_B$  and  $m_B$  are the molar volume, the molar mass and the weight of the compound, respectively,  $A$  is the active surface area of the electrode,  $\tau$  is the charging or discharging time within one procedure,  $\Delta E_\tau$  and  $\Delta E_s$  represent the total voltage change during the current pulse and the steady-state voltage change at the plateau potential, respectively.

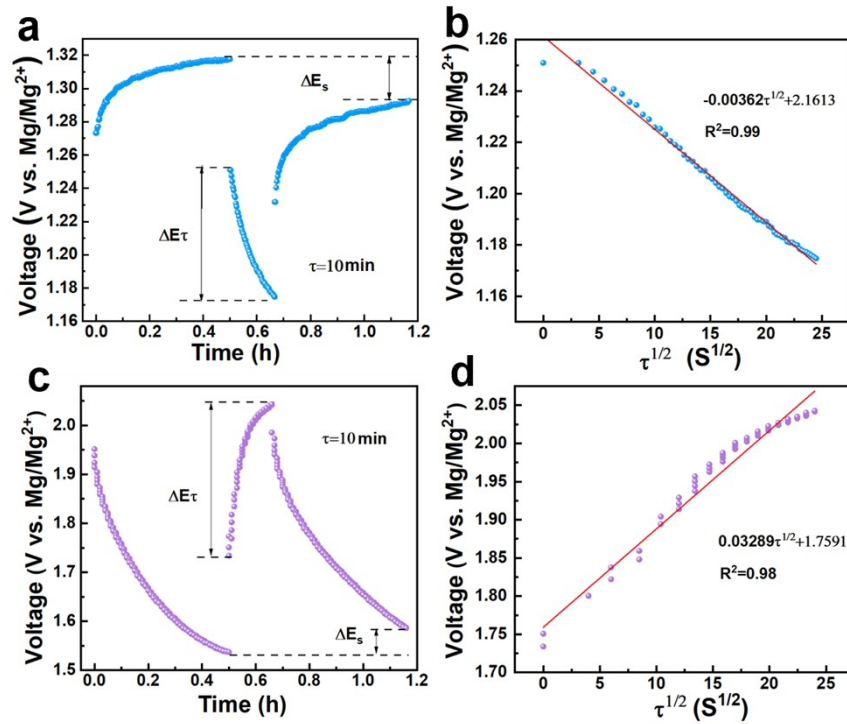

**Fig. S17.** A single GITT titration and the corresponding linear behavior of  $E$  vs.  $\tau^{1/2}$  relationship of CuSe-AHP electrode at (a, b) discharged from 0.91V to 0.82V and (c, d) charged from 1.96V to 2.25V.

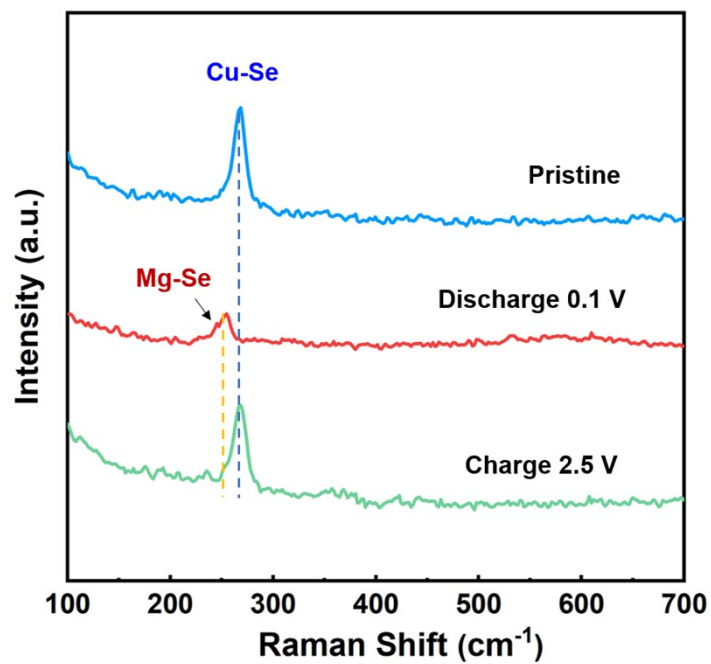

**Fig. S18.** Raman spectra of CuSe-AHP electrode at different charge/discharge states.

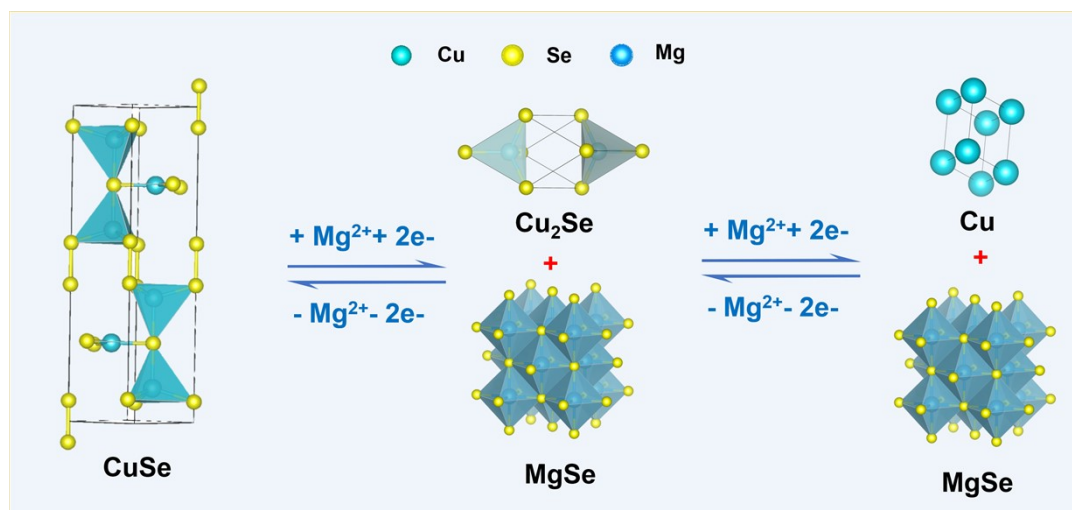

**Fig. S19.** Schematic illustration for magnesium-storage mechanism of CuSe-AHP electrode.



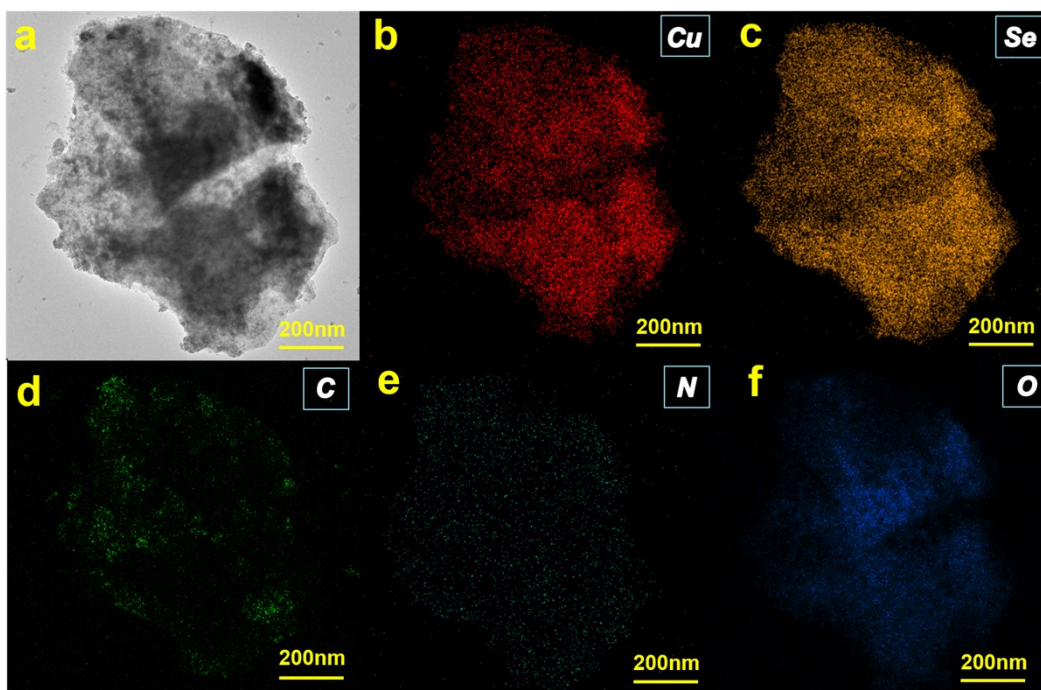

**Fig. S20.** (a) TEM image and (b-f) corresponding elemental (Cu, Se, C, N, O) mapping images of CuSe electrode after 50 cycles.

## References

- 1 S. Yang, F. Ji, Z. Wang, Y. Zhu, K. Hu, Y. Ouyang, R. Wang, X. Ma, C. Cao, *Electrochim Acta* 2019, 324, 134864.
- 2 D. Chen, F. Du, S.-a. Cao, T. Li, F. Xu, *Chem. Eng. J.* 2022, 428, 129545.
- 3 D. Chen, Y. Zhang, J. Shen, X. Li, Z. Chen, S. Cao, T. Li, F. Xu, *Dalton Trans.* 2019, 48, 17516-17523.
- 4 J.-J. Fan, S.-Y. Shen, Y. Chen, L.-N. Wu, J. Peng, X.-X. Peng, C.-G. Shi, L. Huang, W.-F. Lin, S.-G. Sun, *Electrochem. Commun.* 2018, 90, 16-20.
- 5 D. Chen, Y. Zhang, X. Li, J. Shen, Z. Chen, S.-A. Cao, T. Li, F. Xu, *Chem. Eng. J.* 2020, 384, 123235.
- 6 Y. Zhang, T. Li, S.-A. Cao, W. Luo, F. Xu, *ACS Sustainable Chem. Eng.* 2020, 8, 2964-2972.
- 7 J. H. Ha, B. Lee, J. H. Kim, B. W. Cho, S.-O. Kim, S. H. Oh, *Energy Stor. Mater.* 2020, 27, 459-465.

- 8 D. Chen, J. Shen, X. Li, S.-A. Cao, T. Li, W. Luo, F. Xu, *J. Energy Chem.* 2020, 48, 226-232.
- 9 D. Chen, Y. Zhang, X. Li, J. Shen, Z. Chen, S.-A. Cao, T. Li, F. Xu, *Nanoscale.* 2019, 11, 23173-23181.
- 10 F. Zhu, H. Zhang, Z. Lu, D. Kang, L. Han, *J. Energy Stor.* 2021, 42, 103046.
- 11 Y. Zhang, D. Chen, X. Li, J. Shen, Z. Chen, S. A. Cao, T. Li, F. Xu, *Nanoscale.* 2019, 11, 16043.
- 12 M. Wu, Y. Zhang, H. Wu, A. Qin, X. Li, J. Shen, Z. Chen, S. A. Cao, T. Li, F. Xu, *Energy Technol.* 2019, 7, 1800777.
- 13 Y. Xiao, M. Pan, J. Zou, R. Guo, X. Zeng, W. Ding, *Ionics* 2019, 25, 5889-5997.
- 14 Z. Wei, D. Wang, M. Li, Y. Gao, C. Wang, G. Chen, F. Du, *Adv. Energy Mater.* 2018, 8, 1801102.
- 15 C. Pei, F. Xiong, J. Sheng, Y. Yin, S. Tan, D. Wang, C. Han, Q. An, L. Mai, *ACS Appl. Mater. Interfaces* 2017, 9, 17060-17066.
